# Supplementary material for: Detection of Mycoplasma agalactiae in Ticks (Rhipicephalus bursa) Collected by Sheep and Goats in Sicily (South-Italy), Endemic Area for Contagious Agalactia
Source: MDPI journal article supplement (doi:10.3390/microorganisms9112312), 2021-11-08
Supplement: s1 [file s1]

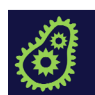

# Supplementary material

**Table S1.** Host, tick species, sex, state and distribution in pools of all sample randomly collected.

| Animal        | Tick species (n.)   | Sex | Engorged | Pool | Real time PCR |              | Isolation |
|---------------|---------------------|-----|----------|------|---------------|--------------|-----------|
| <i>Farm A</i> |                     |     |          |      | <i>Ma</i> *   | <i>Mm</i> ** |           |
| Goat 1        | <i>R. bursa</i> (5) | M   | -        | 1    | neg           | 40           | neg       |
|               | <i>R. bursa</i> (5) | F   | No       | 2    | 39            | neg          | neg       |
| Goat 2        | <i>R. bursa</i> (4) | M   | -        | 3    | neg           | neg          | neg       |
|               | <i>R. bursa</i> (2) | F   | No       | 4    | neg           | 40           | neg       |
|               | <i>R. bursa</i> (2) | F   | Yes      | 5    | 39            | neg          | neg       |
| Goat 3        | <i>R. bursa</i> (3) | M   | -        | 6    | neg           | neg          | neg       |
|               | <i>R. bursa</i> (2) | F   | No       | 7    | neg           | neg          | neg       |
| Goat 4        | <i>R. bursa</i> (2) | M   | -        | 8    | neg           | neg          | neg       |
|               | <i>R. bursa</i> (2) | F   | No       | 9    | neg           | neg          | neg       |
|               | <i>R. bursa</i> (2) | F   | Yes      | 10   | neg           | neg          | neg       |
| Goat 5        | <i>R. bursa</i> (3) | M   | -        | 11   | 40            | neg          | neg       |
|               | <i>R. bursa</i> (4) | F   | No       | 12   | neg           | neg          | neg       |
| Sheep 1       | <i>R. bursa</i> (2) | M   | -        | 13   | neg           | neg          | neg       |
|               | <i>R. bursa</i> (3) | F   | No       | 14   | neg           | neg          | neg       |
|               | <i>R. bursa</i> (4) | F   | Yes      | 15   | neg           | neg          | neg       |
| <i>Farm B</i> |                     |     |          |      |               |              |           |
| Sheep 1       | <i>R. bursa</i> (3) | M   | -        | 1    | neg           | neg          | neg       |
|               | <i>R. bursa</i> (2) | F   | No       | 2    | neg           | neg          | neg       |
| Sheep 2       | <i>R. bursa</i> (3) | M   | -        | 3    | neg           | neg          | neg       |
|               | <i>R. bursa</i> (1) | F   | Yes      | 4    | 38            | neg          | neg       |
| Sheep 3       | <i>R. bursa</i> (3) | M   | -        | 5    | neg           | neg          | neg       |
|               | <i>R. bursa</i> (1) | F   | No       | 6    | neg           | neg          | neg       |
| Sheep 4       | <i>R. bursa</i> (2) | M   | -        | 7    | neg           | neg          | neg       |

|               |                            |   |     |    |     |     |     |
|---------------|----------------------------|---|-----|----|-----|-----|-----|
|               | <i>R. bursa</i> (2)        | F | No  | 8  | neg | neg | pos |
| Sheep 5       | <i>R. bursa</i> (1)        | M | -   | 9  | 37  | neg | neg |
|               | <i>R. bursa</i> (1)        | F | No  | 10 | 38  | 38  | neg |
| Sheep 6       | <i>R. bursa</i> (1)        | M | -   | 11 | 38  | neg | neg |
| Sheep 7       | <i>R. bursa</i> (5)        | M | -   | 12 | neg | neg | pos |
|               | <i>R. bursa</i> (2)        | F | No  | 13 | 38  | 38  | neg |
|               | <i>R. hylusitanium</i> (1) | M | -   | 14 | 38  | 37  | neg |
| Sheep 8       | <i>R. bursa</i> (1)        | F | No  | 15 | neg | neg | neg |
|               | <i>R. bursa</i> (1)        | M | -   | 16 | neg | neg | neg |
| Sheep 9       | <i>R. bursa</i> (1)        | M | -   | 17 | neg | neg | neg |
|               | <i>R. turanicus</i> (1)    | M | -   | 18 | neg | neg | neg |
|               | <i>R. bursa</i> (2)        | F | No  | 19 | neg | neg | neg |
| Sheep 10      | <i>R. bursa</i> (2)        | F | No  | 20 | neg | neg | neg |
| Sheep 11      | <i>R. bursa</i> (5)        | F | No  | 21 | neg | neg | neg |
| <b>Farm C</b> |                            |   |     |    |     |     |     |
| Goat 1        | <i>R. sanguineus</i> (1)   | F | No  | 1  | neg | neg | neg |
|               | <i>R. bursa</i> (1)        | M | -   | 2  | neg | neg | neg |
|               | <i>R. sanguineus</i> (5)   | F | Yes | 3  | neg | neg | neg |
| Goat 2        | <i>R. bursa</i> (1)        | M | -   | 4  | neg | neg | neg |
|               | <i>R. sanguineus</i> (5)   | F | Yes | 5  | neg | neg | neg |
| Goat 3        | <i>R. bursa</i> (3)        | M | -   | 6  | neg | neg | neg |
|               | <i>R. bursa</i> (3)        | F | No  | 7  | 38  | neg | neg |
| Goat 4        | <i>R. bursa</i> (1)        | M | -   | 8  | 38  | 38  | neg |
|               | <i>R. sanguineus</i> (2)   | M | -   | 9  | 39  | 37  | neg |
|               | <i>R. sanguineus</i> (1)   | F | No  | 10 | 38  | 38  | neg |
|               | <i>R. sanguineus</i> (4)   | F | Yes | 11 | neg | neg | neg |
| Goat 5        | <i>R. sanguineus</i> (3)   | M | -   | 12 | 38  | neg | neg |

|        |                     |   |     |    |     |     |     |
|--------|---------------------|---|-----|----|-----|-----|-----|
|        | <i>R. bursa</i> (5) | M | -   | 13 | 38  | neg | neg |
|        | <i>R. bursa</i> (5) | F | No  | 14 | neg | neg | neg |
|        | <i>R. bursa</i> (5) | M | -   | 15 | 38  | neg | pos |
| Goat 6 | <i>R. bursa</i> (5) | F | No  | 16 | 38  | neg | pos |
|        | <i>R. bursa</i> (5) | F | No  | 17 | 40  | neg | pos |
| Goat 7 | <i>R. bursa</i> (2) | F | No  | 18 | 37  | 36  | neg |
| Goat 8 | <i>R. bursa</i> (5) | M | -   | 19 | 38  | 38  | neg |
|        | <i>R. bursa</i> (4) | F | Yes | 20 | neg | neg | neg |

\**M. agalactiae*\*\**M. mycoides* group
